1  
2 **Extinction memory requires the accumulation of N6-methyl-2'-deoxyadenosine in DNA**

3 Xiang Li<sup>1,2,\*</sup>, Wei Wei<sup>2</sup>, Quan Lin<sup>5</sup>, Christophe Magnan<sup>3</sup>, Michael Emami<sup>1</sup>, Luis Eduardo Wearick-Silva<sup>4</sup>, Thiago  
4 W. Viola<sup>4</sup>, Paul Marshall<sup>1</sup>, Rodrigo Grassi-Oliveira<sup>4</sup>, Sarah Nainar<sup>6</sup>, Cathrine Broberg Vågbo<sup>7</sup>, Magnar Bjørås<sup>7</sup>,  
5 Pierre F. Baldi<sup>3</sup>, Robert C. Spitale<sup>6</sup> and Timothy W. Bredy<sup>1,2,\*</sup>  
6

7 <sup>1</sup>Department of Neurobiology and Behavior and Center for the Neurobiology of Learning and Memory,  
8 University of California Irvine, Irvine, CA, USA 92697; <sup>2</sup>Queensland Brain Institute, The University of  
9 Queensland, Brisbane, QLD, Australia 4072; <sup>3</sup>Department of Computer Science and Institute for Genomics  
10 and Bioinformatics, University of California Irvine, Irvine, CA 92697; Biomedical Research Institute, Pontifical  
11 Catholic University of Rio Grande do Sul, Porto Alegre, Brazil; <sup>5</sup> Intellectual Development and Disabilities  
12 Research Center, David Geffen School of Medicine, University of California at Los Angeles, Los Angeles,  
13 California, USA; <sup>6</sup>Department of Pharmaceutical Sciences, University of California Irvine, Irvine, CA, USA  
14 92697; <sup>7</sup>Department of Cancer Research and Molecular Medicine, Norwegian University of Science and  
15 Technology, Trondheim, Norway.  
16  
17

18 \*Please send correspondence to:

19  
20 Xiang Li, Ph.D.

21  
22 Department of Neurobiology and Behavior,  
23 Center for the Neurobiology of Learning and Memory,  
24 University of California Irvine, Irvine, CA, USA 92697  
25 Email: xiangl16@uci.edu  
26

27 AND

28  
29 Timothy W. Bredy, Ph.D.

30  
31 Department of Neurobiology and Behavior,  
32 Center for the Neurobiology of Learning and Memory,  
33 University of California Irvine, Irvine, CA, USA 92697  
34 Email: tbredy@uci.edu  
35

36 Queensland Brain Institute  
37 The University of Queensland  
38 Brisbane, QLD, Australia 4072  
39 Email: t.bredy@uq.edu.au  
40

41 Keywords: m6dA, BDNF, DNA modification, extinction, memory, prefrontal cortex  
42

43 Acknowledgements: The authors gratefully acknowledge grant support from the NIH (5R01MH105398-TWB  
44 and PB), and NIGMS (1DP2GM119164-01-RCS), the NHMRC (APP1033127-TWB), the Conselho Nacional de  
45 Desenvolvimento Científico e Tecnológico (CNPq-CsF-400850/2014-1-RGO), and the Research Council of  
46 Norway (FRIMEDBIO grant 32222-MB). XL is supported by postgraduate scholarships from the University of  
47 Queensland and the ANZ trustees Queensland for medical research. The authors would also like to thank Ms.  
48 Rowan Tweedale for helpful editing of the manuscript, and especially Sunil Gandhi for comments and  
49 discussion.

50 We have discovered that the recently identified mammalian DNA modification N6-methyl-2'-deoxyadenosine  
51 (m6dA) drives activity-induced gene expression in the adult brain and is associated with the formation of fear  
52 extinction memory in C57/Bl6 mice. In activated primary cortical neurons, m6dA accumulates within the P4  
53 promoter of the gene encoding brain-derived neurotrophic factor (bdnf), which is associated with an active  
54 chromatin state, as well as the recruitment of the activating transcription factor Yin-Yang 1 and RNA  
55 polymerase II, thereby promoting bdnf exon IV mRNA expression. Lentiviral-mediated knockdown of a  
56 potential adenine methyltransferase, N6amt1, blocks the effect of neuronal activation on m6dA and its related  
57 chromatin and transcriptional machinery *in vitro*. These effects are recapitulated in the adult brain, where the  
58 extinction learning-induced N6amt1-mediated accumulation of m6dA in the infralimbic prefrontal cortex also  
59 enhances the expression of bdnf exon IV and is necessary for the formation of fear extinction memory.

50 DNA methylation, once considered static and restricted to directing cellular lineage specificity during  
51 early development, is now recognized as being highly dynamic and reversible across the lifespan (1-3).  
52 Although it is known that there are more than 20 DNA modifications (4), nearly all research aimed at  
53 elucidating the role of these chemical modifications in the brain has focused on either 5-methylcytosine (5mC)  
54 or the recently rediscovered 5-hydroxymethylcytosine (5hmC), which is a functionally distinct oxidative  
55 derivative of 5mC (5-7). 5mC and 5hmC are highly prevalent in neurons relative to other cell types (5,8) and  
56 both modifications are regulated in response to learning (9-11). Despite this, a complete understanding of how  
57 DNA methylation controls neuronal gene expression to facilitate memory formation is severely lacking. Beyond  
58 cytosine, recent findings indicate that N6-methyl-2'-deoxyadenosine (m6dA) is also regulated in eukaryotic  
59 DNA. In *C. reinhardtii*, m6dA accumulates at transcription start sites (12) and in *Drosophila*, m6dA increases  
60 across development and is enriched within transposable elements (13). Furthermore, m6dA appears to be  
61 involved in reproductive viability in *C. elegans* (14). These observations have led to the speculation that m6dA  
62 may be a critical regulator of gene expression in lower eukaryotes. Although m6dA is present in the genome of  
63 vertebrates (15), whether it is dynamic in the genome of higher eukaryotes and associated with behavioral  
64 adaptation has yet to be determined.

65 Given that the enrichment of chemical modifications in neuronal DNA confers control over gene  
66 expression programs related to cellular identity during early development and in differentiated neurons, and  
67 that m6dA is associated with activating transcription in lower eukaryotes (12), we hypothesized that m6dA may  
68 also be fundamental for governing experience-dependent gene expression within the mammalian genome. We  
69 therefore set out to explore the role of m6dA within neurons and to elucidate whether it is involved in the  
70 regulation of activity-induced gene expression (Fig. 1A). We first employed a gel shift assay using genomic  
71 DNA derived from primary cortical neurons treated with the restriction enzyme DpnI, which cuts DNA  
72 specifically at methylated adenines in GATC linker sequences (Fig. 1B) (12), which revealed evidence in favor  
73 of m6dA as a modified base in neuronal DNA (Fig. 1C). Mass spectrometry was then used to quantify m6dA  
74 (Fig. 1D). The presence of m6dA was verified and estimated to occur within  $\sim 46$  per  $10^6$  dNs ( $\sim 280,000$  m6dA)

35 across the neuronal genome. We next performed a dot blot assay in order to determine whether m6dA is  
36 dynamic in neuronal DNA. This revealed a significant activity-induced global accumulation of m6dA, which was  
37 evident in primary cortical neurons in culture in response to neural activation (7DIV, 20mM KCl, 7 hrs, Fig 1E,  
38 t-test,  $t_4=2.54$ ,  $p<.05$ ). Together, these data strongly suggest that m6dA is both a dynamic and prevalent base  
39 modification. The relative abundance and distribution of m6dA in the mammalian genome may therefore be  
40 cell-type specific, with greater accumulation in post-mitotic neurons compared to other cell types.

41 In order to elucidate the underlying mechanism by which m6dA accumulates in the mammalian  
42 genome, we examined the expression of two potential mammalian adenine-specific methyltransferases in  
43 primary cortical neurons. N6 adenine-specific DNA methyltransferase 1 (N6amt1) was originally described as a  
44 mammalian ortholog of the yeast adenine methyltransferase MTQ2. Homologs of N6amt1 have been shown to  
45 methylate N6-adenine in bacterial DNA (17); however, whether the same process occurs in mammalian DNA  
46 remains equivocal (18). N6amt1 is highly expressed in the mouse neocortex ([http://mouse.brain-  
47 map.org/experiment/show?id=1234](http://mouse.brain-map.org/experiment/show?id=1234)), which is in accordance with the findings of Ratel et al (16). N6amt2,  
48 which shares a highly conserved methyltransferase domain, is also expressed in the mouse brain  
49 (<http://mouse.brain-map.org/experiment/show?id=69837159>). Based on these observations, N6amt1 and  
50 N6amt2 were selected for an analysis of their role in dynamically regulating the accumulation of m6dA in the  
51 mammalian brain.

52 N6amt1 exhibited a time-dependent increase in mRNA levels in primary cortical neurons in response to  
53 KCl-induced depolarization (Suppl. Fig 1A, t-test,  $t_6=4.14$ ,  $p<.01$ ). There was no effect on N6amt2 (Suppl. Fig.  
54 1B). Behavioral training led to a significant increase in N6amt1 mRNA expression in the infralimbic prefrontal  
55 cortex (ILPFC), *in vivo* (Suppl. Fig. 1C, t-test,  $t_6=3.64$ ,  $p<.01$ ), again with no detectable change in N6amt2  
56 (Suppl. Fig. 1D). In contrast to the ILPFC, hippocampal N6amt1 and N6amt2 mRNA showed no change in  
57 expression in response to behavioral training (Suppl. Fig. 1E-F). These findings indicate that the gene  
58 encoding N6amt1, but not N6amt2, is inducible in primary cortical neurons and is expressed in the infralimbic  
59 prefrontal cortex (ILPFC) in response to extinction learning. The data also suggest that N6amt1 might serve to

L0 regulate the accumulation of m6dA in the neuronal genome in a dynamic, context- and experience-dependent  
L1 manner. To test this possibility, we overexpressed N6amt1 (N6amt1ox) within HEK cells (Suppl. Fig. S2A-C).  
L2 As evidenced by dot blot assay, N6amt1ox led to a significant increase in the global level of m6dA (Suppl. Fig.  
L3 S2D). To further investigate the functional relevance of N6amt1, we co-transfected primary cortical neurons  
L4 with N6amt1ox and N6amt1 shRNA, which blocked the N6am1ox-mediated increase in m6dA (Suppl. Fig.  
L5 S2E). Taken together, these data demonstrate a role for N6amt1 in regulating the activity-induced deposition of  
L6 m6dA within post-mitotic cortical neurons.

L7 *Bdnf* is the most widely expressed inducible neurotrophin in the central nervous system (19), and is  
L8 directly involved in learning and memory (20). In the adult brain, 5mC within BDNF gene promoters is altered  
L9 by experience (21), and this regulation appears to be necessary for the regulation of gene expression  
L10 underlying remote memory (9). The BDNF locus comprises at least eight homologous noncoding exons that  
L11 contribute to alternate 5'UTRs, and a ninth that contributes a protein coding sequence and a 3'UTR (22, 23).  
L12 The complex structure of this locus has led to the idea that *bdnf* expression may be driven by unique DNA  
L13 modifications that guide distinct sets of transcription factor complexes to initiate the transcription of the various  
L14 isoforms (24), all of which could be important for learning and memory formation. This is supported by the fact  
L15 that exon IV is highly activity-dependent and plays a direct role in the formation of fear extinction memory (25,  
L16 26). The *bdnf* exon IV locus therefore represents a prototypical epigenetically responsive gene, ideally suited  
L17 to examine the functional relevance of dynamic changes in m6dA in DNA that are induced by experience.

L18 We therefore asked whether an N6amt1-mediated accumulation of m6dA at the BDNF exon IV locus  
L19 occurs in response to neuronal activation. Chromatin immunoprecipitation analysis revealed an increase in  
L20 N6amt1 occupancy (Fig. 2A, t-test,  $t_6=2.77$ ,  $p<.05$ ), but not N6amt2 (Fig. 2B), at a region of the BDNF P4  
L21 promoter immediately downstream of the transcription start site (TSS). This was accompanied by a significant  
L22 increase in the deposition of m6dA at the same locus (Fig. 2C, t-test,  $t_4=3.934$ ,  $p<.01$ ). In order to more  
L23 precisely define the accumulation of m6dA, the Dpn1 restriction enzyme digestion approach was again used.  
L24 KCl-induced depolarization led to an increase in m6dA at a GATC site adjacent to the consensus sequence for

35 the activating transcription factor Yin-Yang (YY1) (Fig 2D. t-test,  $t_4=2.76$ ,  $p<.05$ ). Neuronal stimulation led to  
36 increased occupancy of the active chromatin mark H3K4<sup>me3</sup> (Fig. 2E, t-test,  $t_{14}=2.59$ ,  $p<.05$ ), as well as  
37 increased binding of YY1 proximal to the m6dA modified adenine (Fig. 2F, t-test,  $t_4=5.58$ ,  $p<.01$ ). There was  
38 also a concomitant increase in the presence of RNA polymerase (Pol) II at this site, which is strongly predictive  
39 of transcriptional elongation (Fig. 2G, t-test,  $t_4=4.04$ ,  $p<.01$ ). The activity-induced changes in N6amt1  
40 occupancy, m6dA accumulation and related changes in the local chromatin landscape and transcriptional  
41 machinery correlated with the induction of bdnf exon IV mRNA expression (Fig. 2H, t-test,  $t_6=16.08$ ,  $p<.001$ ).  
42 Importantly, the observed m6dA deposition and associated changes did not occur at a distal GATC site located  
43 within the BDNF P4 promoter 1000bp upstream of the TSS (Suppl. Fig. S3A-E).

44 In order to gain deeper insight into the mechanism by which dynamic changes in m6dA influence bdnf  
45 exon IV expression, an N6amt1 shRNA was generated according to our previously published protocols and its  
46 efficiency was validated *in vitro* (Suppl. Fig. S4). In primary cortical neurons infected with N6amt1 shRNA, the  
47 observed activity-dependent N6amt1 occupancy and m6dA deposition at the exon IV locus were eliminated  
48 (Suppl. Fig S5A-B) and this effect correlated with reduced H3K4<sup>me3</sup>, decreased recruitment of YY1 and  
49 diminished Pol II occupancy at the predicted GATC site within the P4 promoter (Suppl. Fig S5C-E). The  
50 change in the local chromatin landscape and recruitment of transcription factors led to reduced bdnf exon IV  
51 mRNA expression (Suppl. Fig S5F). However, overexpression of N6amt1 in primary cortical neurons *in vitro*  
52 did not increase the deposition of m6dA at the same GATC site *in vitro*, even though the accumulation of m6dA  
53 was blocked in the presence of N6amt1 shRNA (Suppl. Fig. S2F). Together, these data demonstrate that one  
54 critically important role for an N6amt1-associated accumulation of m6dA in DNA is to promote bdnf expression  
55 in response to neural activation. Furthermore, our findings suggest that the activity-dependent deposition of  
56 m6dA by N6amt1 likely occurs in a tightly regulated and spatiotemporally controlled manner through locus-  
57 specific chromatin modification and the recruitment of activating transcription machinery (Fig 2I).

58 It is important to note that although we provide strong evidence to suggest that N6amt1 is necessary for  
59 the dynamic accumulation of m6dA, at this stage we cannot conclude whether this occurs via its putative

adenine methyltransferase domain or by some other protein-DNA interaction. Indeed, the latter is a distinct possibility given that other epigenetic regulatory proteins known to control DNA modification, such as the Tet family of dioxygenases, can exert their influence independent of their catalytic activity (27,28). By using recombinant protein and *in vitro* methyltransferase assays, future studies will aim to determine whether N6amt1 coordinates m6dA deposition either as part of a larger complex or directly through enzymatic activity.

To determine whether the observed effects in primary cortical neurons are also functionally relevant in the adult brain, we next examined the role of m6dA in regulating extinction learning-induced *bdnf* exon IV mRNA expression within the ILPFC. The inhibition of learned fear is an evolutionarily conserved behavioral adaptation that is essential for survival. This process, known as fear extinction, involves rapid reversal of previously learned contingencies, which depend on gene expression in various brain regions. The paradigm of fear extinction has long been recognized as an invaluable tool for investigating the neural mechanisms of emotional learning and memory, and the important contribution of the ILPFC to extinction has been demonstrated (29). A variety of epigenetic mechanisms in the ILPFC have been implicated in fear extinction (11, 25, 30). This behavioral model therefore serves as a robust platform to interrogate the role of epigenetic mechanisms in a critically important memory process of critical importance.

Similar to the effect of KCl-induced depolarization on m6dA and correlated gene expression *in vitro*, fear extinction learning (EXT) led to an increase in N6amt1 occupancy relative to that in mice which had been fear conditioned and only exposed to a novel context (FC-No EXT) (Fig. 3A, t-test,  $t_{10}=1.87$ ,  $p<.05$ ). This was accompanied by increased deposition of m6dA (Fig. 3B, t-test,  $t_{10}=2.81$ ,  $p<.05$ ). The data also revealed a significant increase in H3K4<sup>me3</sup> occupancy (Fig. 3C, t-test,  $t_{14}=2.57$ ,  $p<.05$ ), an increase in the recruitment of YY1 (Fig. 3D, t-test,  $t_{10}=1.89$ ,  $p<.05$ ), and increased Pol II occupancy (Fig. 3E, t-test,  $t_{10}=2.87$ ,  $p<.01$ ). Finally, in a agreement with the known role of BDNF in fear extinction, there was a significant increase in *bdnf* exon IV mRNA expression in the ILPFC in response to fear extinction training (Fig. 3F, t-test,  $t_{14}=2.75$ ,  $p<.01$ ).

Having established a relationship between an extinction learning-induced accumulation of m6dA and the regulation of *bdnf* exon IV mRNA expression *in vivo*, we next investigated whether lentiviral-mediated



knockdown of N6amt1 in the ILPFC affected the formation of fear extinction memory (Fig. 4A). We first validated the efficacy of the knockdown construct, which showed excellent transfection efficiency and a reliable decrease in N6amt1 mRNA expression when infused directly into the ILPFC prior to behavioral training (Suppl. Fig. 6A-B). There was no effect of N6amt1 shRNA on within-session performance during the first 10 conditioned stimulus exposures during fear extinction training (Fig. 4B-C), and there was no effect of N6amt1 shRNA on fear expression in mice that had been fear conditioned and exposed to a novel context without extinction training (Fig. 4D-left, preCS). However, in mice that had been extinction trained in the presence of N6amt1 shRNA, there was a highly significant impairment in fear extinction memory (Fig. 4D-right, two-way ANOVA  $F_{1,28} = 9.18$ ,  $p < .01$ ; Bonferroni's posthoc test; EXT scrambled vs. EXT shRNA,  $p < .001$ ). As a control, we also generated an N6amt2 shRNA and observed no effect of N6amt2 knockdown in the ILPFC on the formation of fear extinction memory (Fig. 4E-G). Infusion of the N6amt1 shRNA into the prelimbic region of the prefrontal cortex, a brain region immediately dorsal to the ILPFC and not required for the acquisition or expression of fear extinction memory, also had no effect (Suppl. 7D). These data demonstrate an important role for the N6amt1-mediated accumulation of m6dA in the ILPFC in regulating the formation of fear extinction memory. At this stage, however, a more generalized role for m6dA in other forms of learning and memory cannot be ruled out.

With respect to the epigenetic landscape and transcriptional machinery surrounding the BDNF P4 promoter *in vivo*, knockdown of N6amt1 prevented the extinction learning-induced increase in N6amt1 occupancy (Fig. 5A,  $p < .01$ ) and the accumulation of m6dA (Fig. 5B,  $p < .05$ ). N6amt1 knockdown also blocked the extinction-learning induced increase H3K4<sup>me3</sup> (Fig. 5C,  $**p < .01$ ), YY1 (Fig. 5D,  $p < .01$ ), and Pol II occupancy at the BDNF P4 promoter (Fig. 5E,  $p < .001$ ). Finally, similar to the *in vitro* findings, N6amt1 knockdown blocked the effect of extinction training on bdnf exon IV mRNA expression (Fig. 5F,  $p < .01$ ). Taken together, these findings suggest that a dynamic, learning-induced, accumulation of m6dA in the adult ILPFC, mediated in part by N6amt1, plays a critical role in regulating experience-dependent bdnf exon IV expression and the formation of extinction memory.



YY1 initiates context-specific gene expression through interaction with Pol II (31-33), which is dependent on DNA methylation and changes in the local chromatin landscape (34-36). In agreement with these findings, the activity-induced expression of *bdnf* exon IV in primary cortical neurons, and within the ILPFC following behavioral training, is functionally related to an N6amt1-mediated increase in the accumulation of m6dA at the BDNF P4 promoter (Suppl. Fig. S4A-B and Fig. 4H-I). This is also associated with the presence of H3K4<sup>me3</sup>, an epigenetic mark that reflects an active chromatin state (Suppl. Fig. S4C and Fig. 4J), and is accompanied by increased occupancy of the transcription factor YY1 and Pol II at the same locus (Suppl. Fig. S4C-D and Fig 4K-I). Our findings demonstrate that the accumulation of m6dA surrounding the TSS of the BDNF P4 promoter drives activity-induced and experience-dependent exon IV mRNA expression, which is in agreement with recent findings on m6dA-mediated transcriptional activation in lower eukaryotes (12).

Other DNA modifications, including oxidative derivatives of 5mC, are found within gene promoters as well as gene bodies and have been shown to interact with Pol II to induce transient pausing of the Pol II elongation complex to promote gene expression (13, 37, 38). This suggests that Pol II has the capacity to detect a variety of DNA modifications, including m6dA, and that this interaction may serve to fine-tune the rate of Pol II-mediated transcription. The high degree of specificity of m6dA accumulation at a specific GATC site proximal to the TSS in the BDNF P4 promoter, further suggests that this particular DNA modification confers tight control over exon IV expression through regionally selective epigenetic regulation. Indeed, Pol II is recruited to the P1 promoter in a spatiotemporally regulated manner, resulting in 'waves' of BDNF exon I mRNA expression (39). Thus, the m6dA-mediated recruitment of YY1 and Pol II at activity-induced genes supporting memory formation may also provide a signal to sequester other epigenetic regulatory mechanisms in order to promote experience-dependent genomic metaplasticity, and to guide future patterns of learning-induced gene expression (2).

In summary, the discovery of activity-induced accumulation of m6dA in the mammalian genome that is required for memory formation dramatically expands the scope of experience-dependent DNA modifications in the brain. It is evident that the information-processing capacity of DNA is far more complex than current

35 perspectives, and our finding that m6dA is a potent regulator of gene expression likely represents the tip of the  
36 iceberg for this newly discovered epigenetic mark. We predict that a large number of dynamic and functional  
37 modifications on *all four* canonical nucleobases remain to be discovered, and it will be within the realm of  
38 cognition and memory where the impact of these novel epigenetic purveyors of genomic and behavioral  
39 diversity will be most significant.

References

1. C. A. Miller, S. L. Campbell, J. D. Sweatt, DNA methylation and histone acetylation work in concert to regulate memory formation and synaptic plasticity. *Neurobiology of learning and memory*. **89(4)**, 599-603 (2008).
2. D. Baker-Andresen, V. S. Ratnu, T. W. Bredy, Dynamic DNA methylation: a prime candidate for genomic metaplasticity and behavioral adaptation. *Trends in neurosciences*. **36(1)**, 3-13 (2013).
3. K. Gapp, B. T. Woldemichael, J. Bohacek, I. M. Mansuy, Epigenetic regulation in neurodevelopment and neurodegenerative diseases. *Neuroscience*. **264**, 99–111 (2014).
4. J. Korlach, S. W. Turner, Going beyond five bases in DNA sequencing. *Current Opinion in Structural Biology*. **22**, 251–261 (2012).
5. R. Lister *et al.*, Global Epigenomic Reconfiguration During Mammalian Brain Development. *Science*. **341**, 1237905–1237905 (2013).
6. J. U. Guo, Y. Su, C. Zhong, G. Ming, H. Song, Hydroxylation of 5-Methylcytosine by TET1 Promotes Active DNA Demethylation in the Adult Brain. *Cell* **145(3)**, 423-434 (2011).
7. L. Shen *et al.*, Tet3 and DNA Replication Mediate Demethylation of Both the Maternal and Paternal Genomes in Mouse Zygotes. *Cell Stem Cell*. **15**, 459–470 (2014).
8. T. Khare *et al.*, 5-hmC in the brain is abundant in synaptic genes and shows differences at the exon-intron boundary. *Nat Struct Mol Biol*. **19**, 1037–1043 (2012).
9. C. A. Miller *et al.*, Cortical DNA methylation maintains remote memory. *Nat Neurosci*. **13**, 664–666 (2010).
10. B. F. Vanyushin, A. L. Mazin, V. K. Vasilyev, A. N. Belozersky, The content of 5-methylcytosine in animal DNA: The species and tissue specificity. *Biochimica et Biophysica Acta (BBA) - Nucleic Acids and Protein Synthesis*. **299**, 397–403 (1973).
11. X. Li *et al.*, Neocortical Tet3-mediated accumulation of 5-hydroxymethylcytosine promotes rapid behavioral adaptation *PNAS*. **111(19)**, 7120-7125 (2014).
12. Y. Fu *et al.*, N6-Methyldeoxyadenosine Marks Active Transcription Start Sites in *Chlamydomonas*. *Cell*. **161(4)**, 879-892 (2015).
13. G. Zhang *et al.*, N6-methyladenine DNA modification in *Drosophila*. *Cell*. **161(4)**, 893–906 (2015).
14. E. L. Greer, M. A. Blanco, L. Gu, E. Sendinc, J. Liu, DNA Methylation on N6-Adenine in *C. elegans*. *Cell* **161 (4)**, 868-878 (2015).
15. Koziol MJ *et al.* Identification of methylated deoxyadenosines in vertebrates reveals diversity in DNA modifications. *Nature Structural Molecular Biology*. **23**, 24-28 (2016).
16. D. Ratel *et al.*, Undetectable levels of N6-methyl adenine in mouse DNA: Cloning and analysis of PRED28, a gene coding for a putative mammalian DNA adenine methyltransferase. *FEBS Lett*. **580**, 3179–3184 (2006).

- 75 17. C. Stephens, A. Reisenauer, R. Wright, L. Shapiro, A cell cycle-regulated bacterial DNA  
76 methyltransferase is essential for viability. *PNAS*, **93(3)**, 1210-1214 (1996).
- 77 18. D. Ratel, J.-L. Ravanat, F. Berger, D. Wion, N6-methyladenine: the other methylated base of DNA.  
78 *Bioessays*. **28**, 309–315 (2006).
- 79 19. A. Ghosh, J. Carnahan, M. Greenberg, Requirement for BDNF in activity-dependent survival of cortical  
30 neurons. *Science*. **263**, 1618–1623 (1994).
- 31 20. J. Peters, L. M. Dieppa-Perea, L. M. Melendez, G. J. Quirk, Induction of Fear Extinction with  
32 Hippocampal-Infralimbic BDNF. *Science*. **328**, 1288–1290 (2010).
- 33 21. F. D. Lubin, T. L. Roth, J. D. Sweatt, Epigenetic Regulation of *bdnf* Gene Transcription in the  
34 Consolidation of Fear Memory. *Journal of Neuroscience*. **28**, 10576–10586 (2008).
- 35 22. T. Aid, A. Kazantseva, M. Piirsoo, K. Palm, Mouse and rat BDNF gene structure and expression  
36 revisited. *Journal of Neuroscience*. **85(3)**, 525-535 (2007).
- 37 23. A. E. West, V. Orlando, Epigenetics in brain function. *Neuroscience*. **264**, 1–3 (2014).
- 38 24. A. E. West, Biological Functions of Activity-Dependent Transcription Revealed. *Neuron*. **60**, 523–525  
39 (2008).
- 40 25. T. W. Bredy *et al.*, Histone modifications around individual BDNF gene promoters in prefrontal cortex  
41 are associated with extinction of conditioned fear. *Learning & Memory*. **14**, 268–276 (2007).
- 42 26. K. Sakata *et al.*, Role of activity-dependent BDNF expression in hippocampal–prefrontal cortical  
43 regulation of behavioral perseverance. *PNAS*. **110(37)**, 15103-8 (2013).
- 44 27. Kaas, G.A., *et al.* TET1 Controls CNS 5-Methylcytosine Hydroxylation, Active DNA Demethylation, Gene  
45 Transcription, and Memory Formation. *Neuron*, **79**, 1086-1093 (2013).
- 46 28. Deplus R, *et al.* Tet2 and Tet3 regulate GlcNAcylation and H3K4 methylation through OGT and  
47 SET1/COMPASS. *EMBO J*. **32(5)**, 645-55. (2013).
- 48 29. R. G. Parsons, K. J. Ressler, Implications of memory modulation for post-traumatic stress and fear  
49 disorders. *Nat Neurosci*. **16**, 146–153 (2013).
- 50 30. W. Wei *et al.*, p300/CBP-Associated Factor Selectively Regulates the Extinction of Conditioned Fear.  
51 *Journal of Neuroscience*. **32**, 11930–11941 (2012).
- 52 31. A. Usheva, T. Shenk, TATA-binding protein-independent initiation: YY1, TFIIB, and RNA polymerase II  
53 direct basal transcription on supercoiled template DNA. *Cell*. **76**, 1115–1121 (1994).
- 54 32. M. E. Donohoe, L. F. Zhang, N. Xu, Y. Shi, J. T. Lee, Identification of a Ctfc Cofactor, Yy1, for the X  
55 Chromosome Binary Switch. *Molecular cell*. **25(1)**, 43-56. (2007).
- 56 33. P. Navarro, P. Avner, An embryonic story: Analysis of the gene regulative network controlling Xist  
57 expression in mouse embryonic stem cells. *Bioessays*. **32**, 581–588 (2010).
- 58 34. N. Funahashi *et al.*, YY1 positively regulates human UBIAD1 expression. *Biochemical and Biophysical  
59 Research Communications*. **460**, 238–244 (2015).

35. M. Makhlouf *et al.*, A prominent and conserved role for YY1 in Xist transcriptional activation. *Nat Comms.* **5**, 4878 (2014) DOI: 10.1038/ncomms5878.
36. A. G. Chapman, A. M. Cotton, A. D. Kelsey, C. J. Brown, Differentially methylated CpG island within human XIST mediates alternative P2 transcription and YY1 binding. *BMC Genet.* **15**, 372 (2014).
37. M. W. Kellinger *et al.*, 5-formylcytosine and 5-carboxylcytosine reduce the rate and substrate specificity of RNA polymerase II transcription. *Nat Struct Mol Biol.* **19**, 831–833 (2012).
38. L. Wang *et al.*, Molecular basis for 5-carboxycytosine recognition by RNA polymerase II elongation complex. *Nature.* **523**, 621–625 (2015).
39. F. Tian *et al.*, Dynamic chromatin remodeling events in hippocampal neurons are associated with NMDA receptor-mediated activation of Bdnf gene promoter 1. *Journal of Neurochemistry.* **109**, 1375–1388 (2009).

Fig. 1

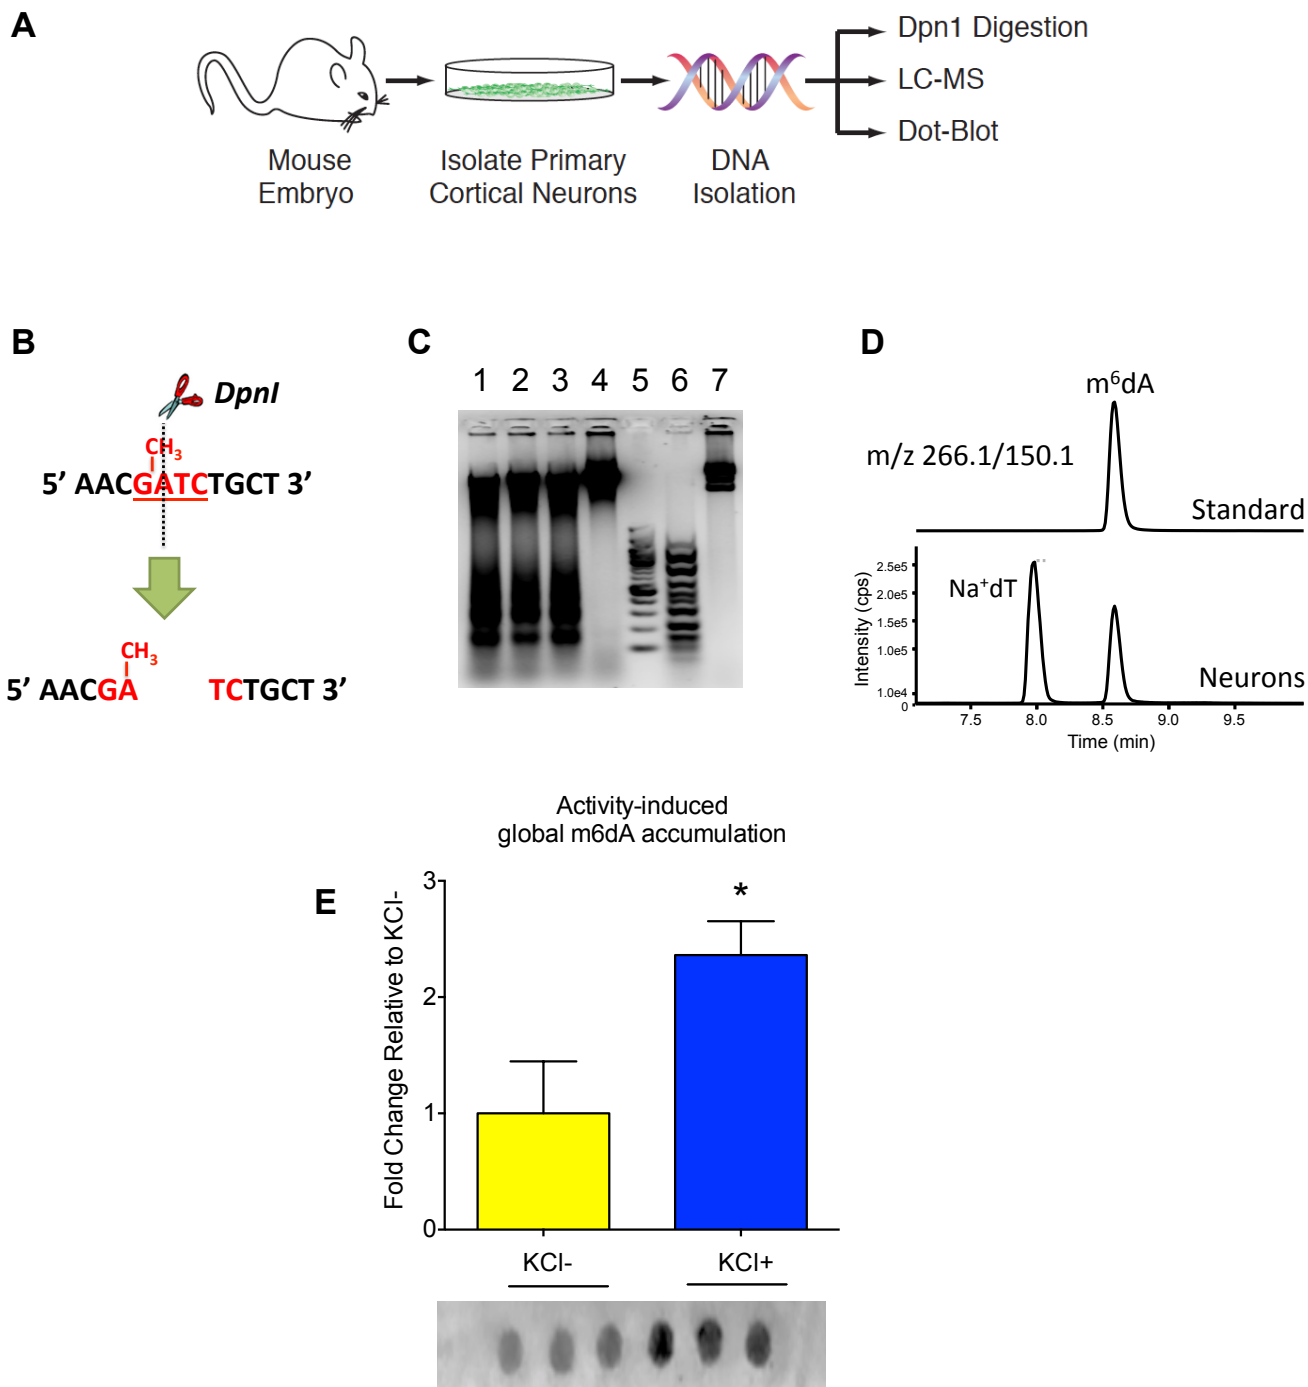

Fig. 2

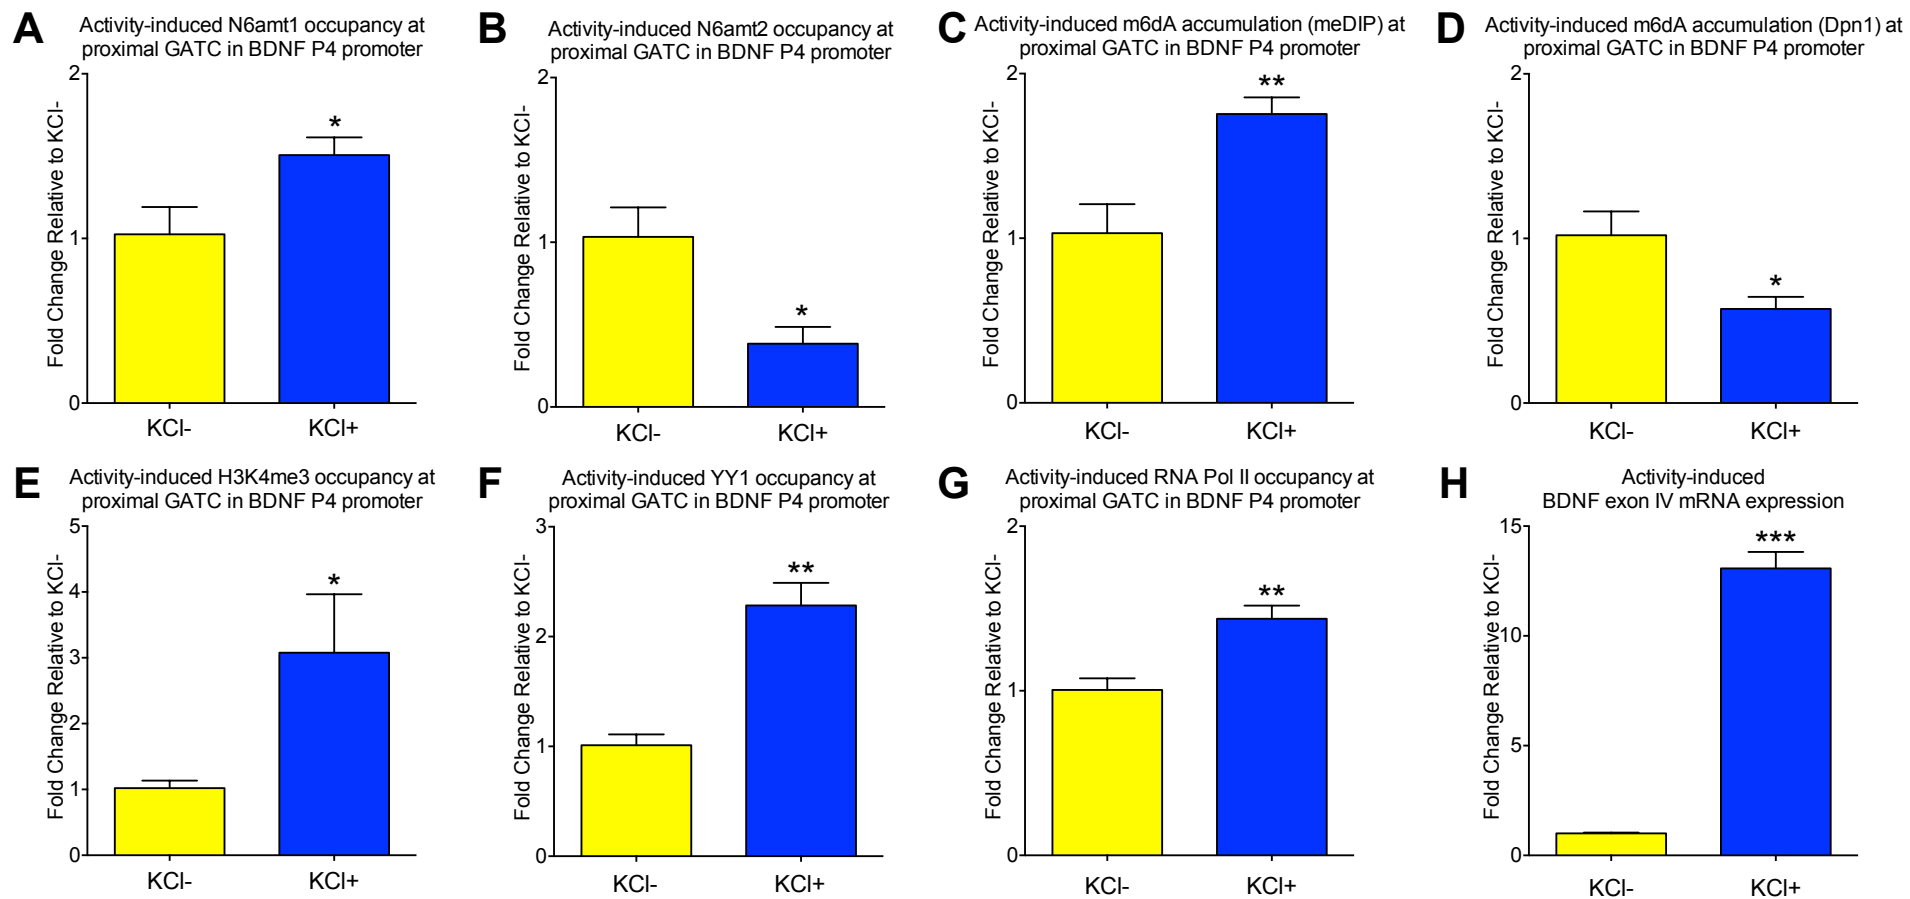

**I**

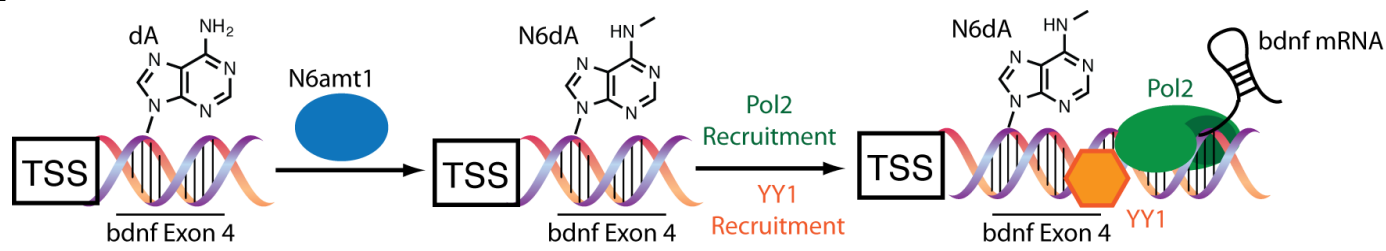



Fig. 3

**A** Learning-induced N6amt1 occupancy at proximal GATC in BDNF P4 promoter

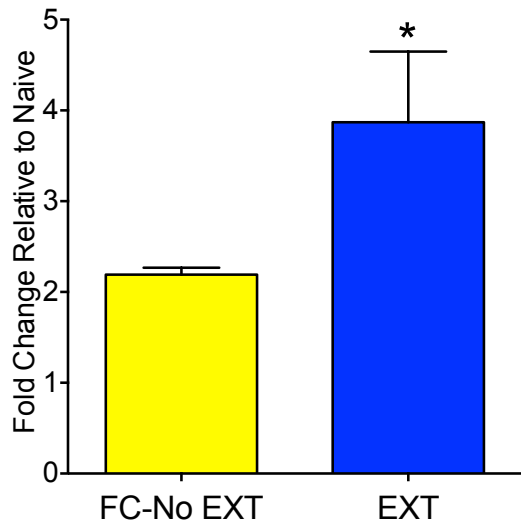

**B** Learning-induced m6dA accumulation (Dpn1) at proximal GATC in BDNF P4 promoter

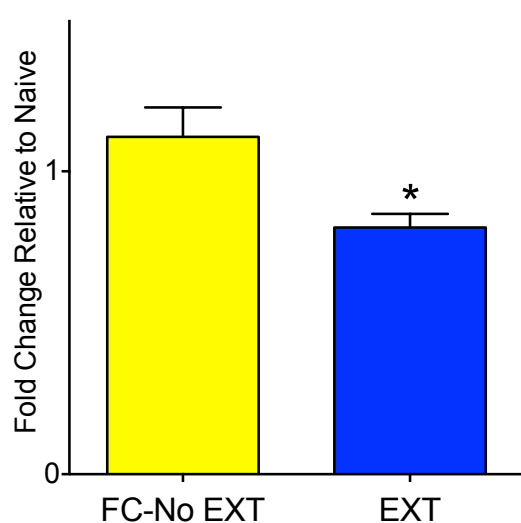

**C** Learning-induced H3K4me3 occupancy at proximal GATC in BDNF P4 promoter

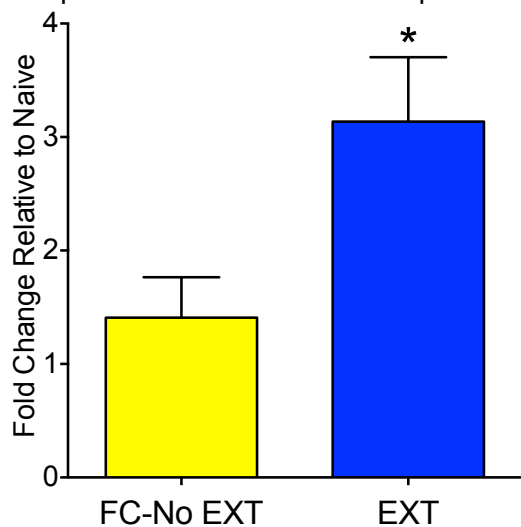

**D** Learning-induced YY1 occupancy at proximal GATC in BDNF P4 promoter

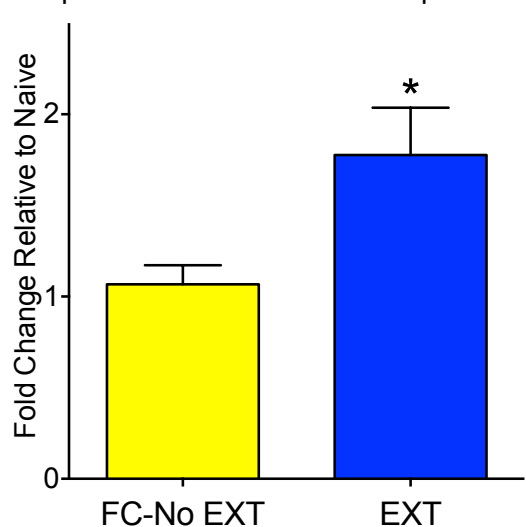

**E** Learning-induced RNA Pol II occupancy at proximal GATC in BDNF P4 promoter

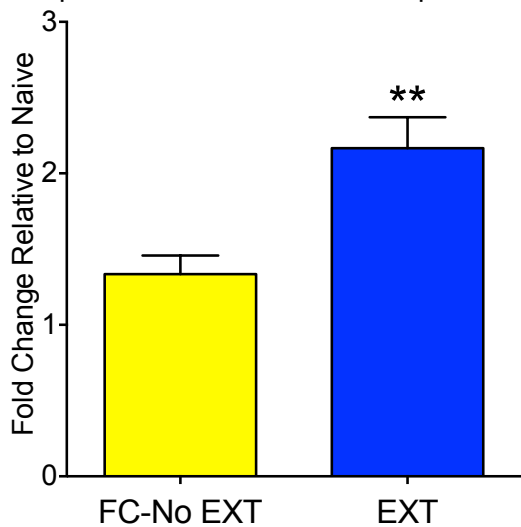

**F** Learning-induced BDNF exon IV mRNA expression

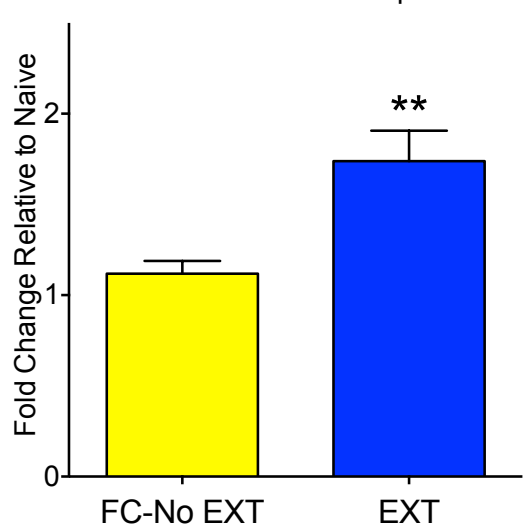

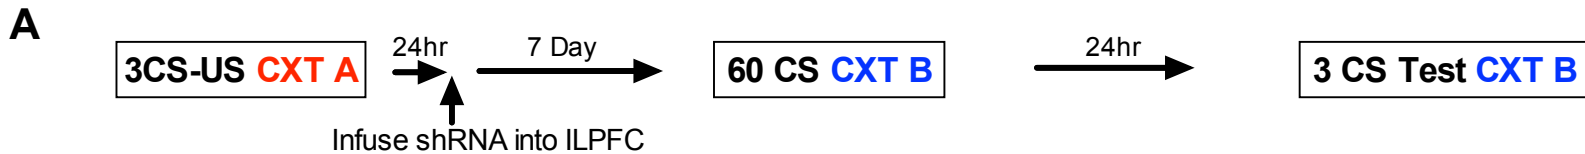

**B** Acquisition (with N6amt1 shRNA)

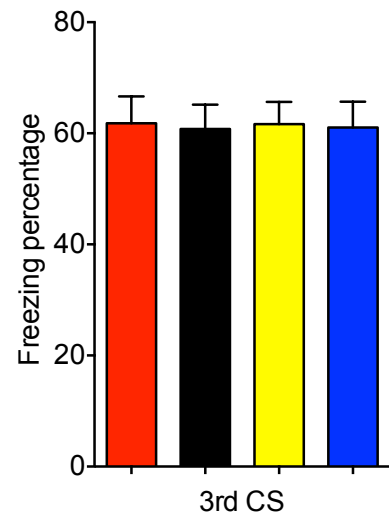

**C** Extinction Training (with N6amt1 shRNA)

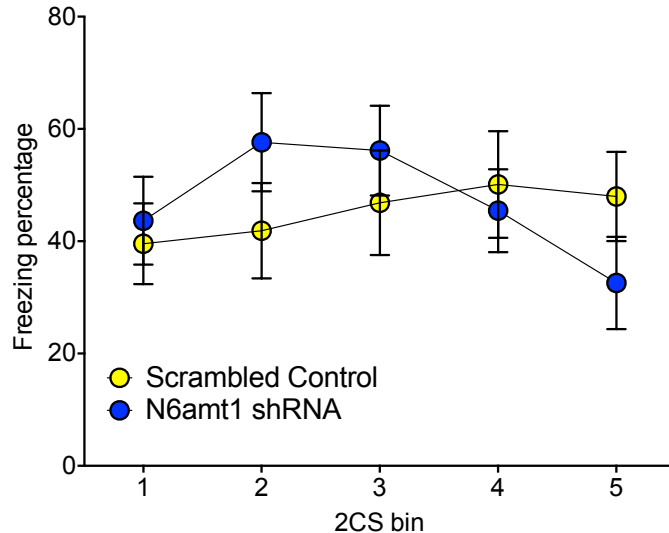

**D** Extinction Memory Test (with N6amt1 shRNA)

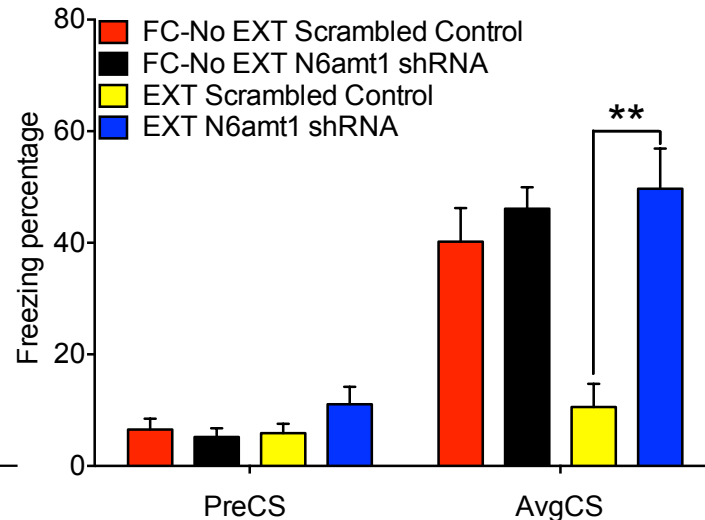

**E** Acquisition (with N6amt2 shRNA)

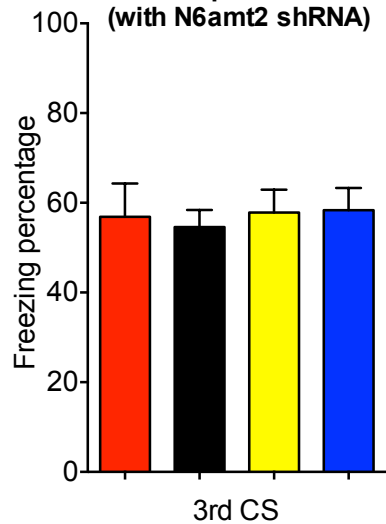

**F** Extinction Training (with N6amt2 shRNA)

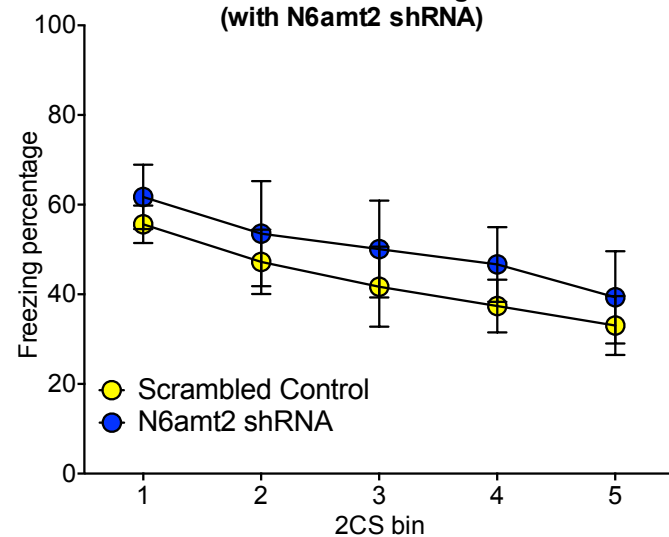

**G** Extinction Memory Test (with N6amt2 shRNA)

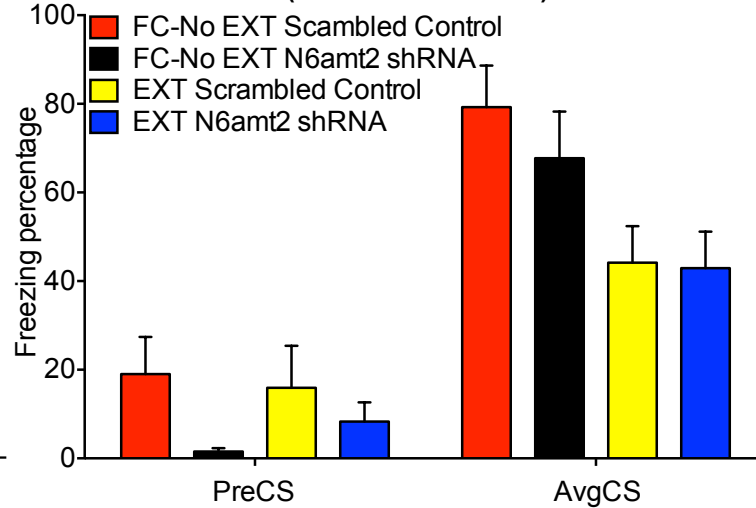

**A** Learning-induced N6amt1 occupancy at GATC in BDNF P4 promoter with N6amt1 shRNA

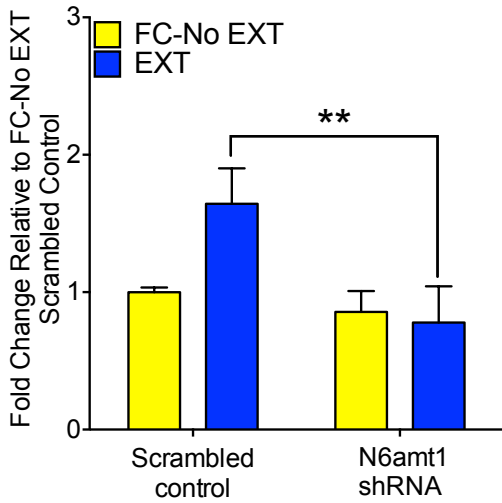

**B** Learning-induced m6dA accumulation (Dpn1) at GATC in BDNF P4 promoter with N6amt1 shRNA

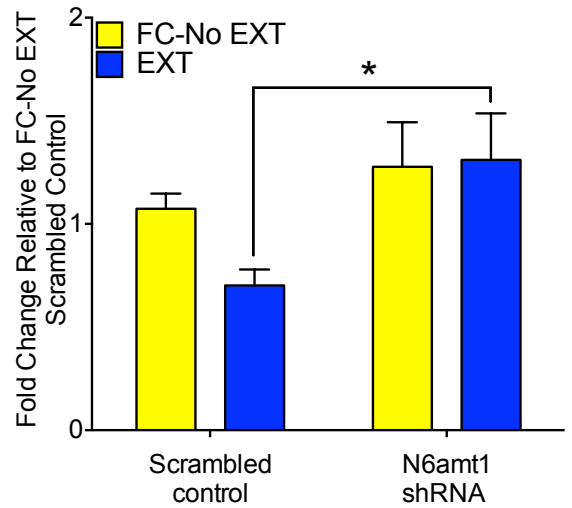

**C** Learning-induced H3K4 occupancy at GATC in BDNF P4 promoter with N6amt1 shRNA

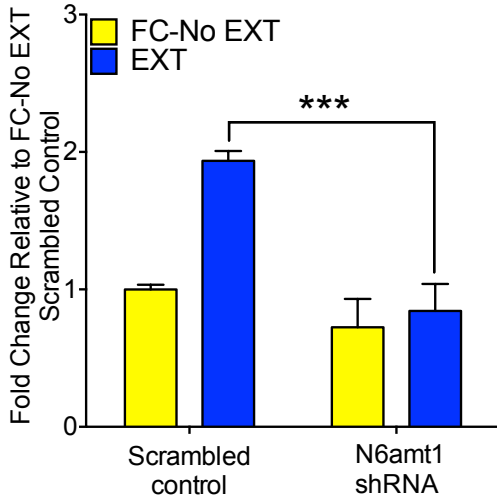

**D** Learning-induced YY1 occupancy at GATC in BDNF P4 promoter with N6amt1 shRNA

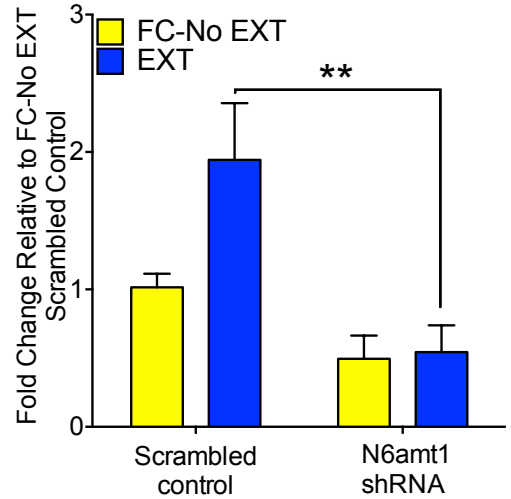

**E** Learning-induced RNA Pol II occupancy at GATC in BDNF P4 promoter with N6amt1 shRNA

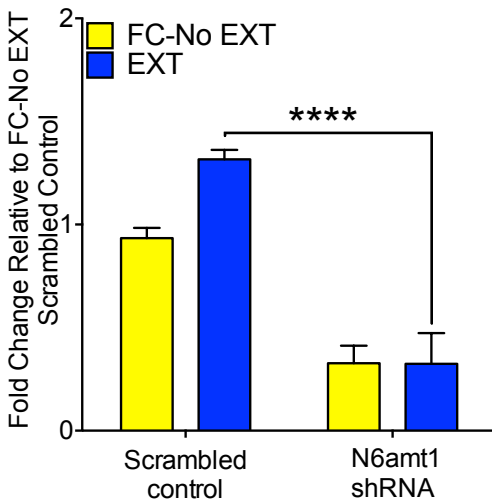

**F** Learning-induced BDNF exon IV mRNA expression with N6amt1 shRNA

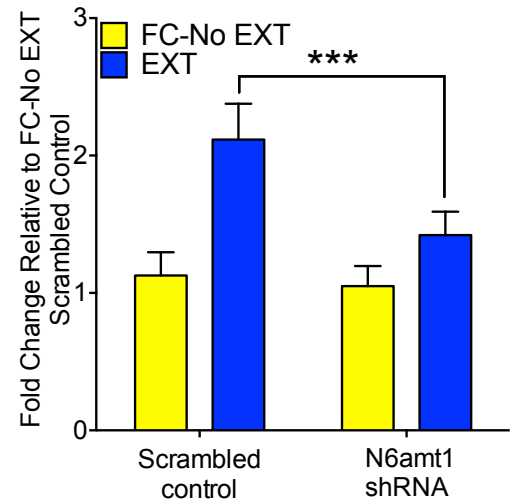

Source: http://biorxiv.org/content/10.1101/059972v2.full.pdf
